# Supplementary material
Source: ML conference proceedings conference paper supplement (https://proceedings.neurips.cc/paper_files/paper/2022/hash/61aa557643ae8709b6a4f41140b2234a-Abstract.html)
Supplement: Supplementary file 1 [file 61aa557643ae8709b6a4f41140b2234a-Supplemental-Conference.zip]

Archive with 1 entries (1 files):
- PaperID_726_Deliberated_Domain_Bridging_for_Domain_Adaptive_Semantic_Segmentation_Supplementary_Material.pdf
